1 **Title:** Assessing assay absorption artefacts in *in vitro* cell responses to particles

2

3 Seiha Yen <sup>a</sup>, Graeme R. Zosky <sup>a, b</sup>, Yong Song <sup>a\*</sup>

4

5 *<sup>a</sup>Menzies Institute for Medical Research, College of Health and Medicine, University of Tasmania,*  
6 *Hobart, Tasmania, 7000, Australia.*

7 *<sup>b</sup>Tasmanian School of Medicine, College of Health and Medicine, University of Tasmania, Hobart,*  
8 *Tasmania, 7000, Australia.*

9

10

11 **\*Corresponding Author:**

12 *Dr Yong Song; Menzies Institute for Medical Research, College of Health and Medicine, University*  
13 *of Tasmania, Hobart, Tasmania, 7000, Australia; Ph: +61 3 6226 4758; Email:*  
14 *[yong.song@utas.edu.au](mailto:yong.song@utas.edu.au); Postal address: Private Bag 23, Hobart, Tasmania, Australia, 7000.*

15

16 **Abstract**

17 In this study, we assessed the issue of coal particles absorbing extracellular proteins and tested the  
18 effects of different culture conditions and processing strategies to address this issue. Our data show  
19 that there is no effective strategy to solve this problem. We agree with previous reports that  
20 cytokine binding experiments should be performed to implement appropriate correction factors in  
21 order to calculate the accurate production of secreted cytokines in the supernatant of cell culture  
22 experiments. This is an underappreciated issue in many published studies on the comparative  
23 potency of particles from different sources.

24

25 *To the Editor:*

26 *In vitro* cell culture systems are an indispensable platform for investigating cellular mechanisms of  
27 the adverse health effects of particle inhalation on the lung. Proinflammatory cytokine responses are  
28 considered a key cellular event in particles-induced diseases which mainly target pulmonary  
29 epithelial cells and macrophages. In exploring the contribution of coal particle chemistry (Song et  
30 al., 2022) to the variable risk of developing coal workers' pneumoconiosis (CWP), an incurable  
31 lung disease linked to coal dust inhalation, we became concerned about protein production data  
32 which we were quantifying by enzyme-linked immunosorbent assay (ELISA). While we found a  
33 variable cytotoxic effect, this was not reflected in our cytokine assays. Upon reviewing the  
34 literature, it became apparent that there was some precedent to this observation with some studies  
35 raising concerns that the particles may non-specifically bind secreted cytokines, possibly  
36 confounding the results of bioassays such as ELISAs (Kocbach et al., 2008, Grytting et al., 2021).  
37 Thus, we hypothesised that coal particles variably absorbed extracellular cytokines, leading to  
38 underestimation of cytokine response in *in vitro* experiments.

39 To test our hypothesis, we first mixed pro-inflammatory cytokines IL-1 $\beta$ , IL-6, IL-8 and TNF- $\alpha$   
40 with 200  $\mu$ g/mL of coal particles in RPMI-1640 growth medium with 10  $\mu$ M Phorbol 12-myristate  
41 13-acetate and 10% fetal bovine serum (FBS) or in Ham's F-12K medium supplemented with 10%  
42 FBS and 1% glutamine. The cytokine solutions were prepared from recombinant cytokine standards  
43 obtained from ELISA kits (Colorimetric assay RDSY201 for IL-1 $\beta$ , RDSY406 for IL-6,  
44 RDSY208 for IL-8, RDSY210 for TNF-  $\alpha$  from R&D Systems; Fluorescent assay, ab229402 for  
45 IL-8 from Abcam). We spiked the cytokines (the second high and the last standards in the kits) into  
46 cell-free medium with high (125 ng/mL for IL-1 $\beta$ , 300 ng/mL for IL-6, 1000 ng/mL for IL-8 and  
47 500 ng/mL for TNF- $\alpha$ ) and low (8 ng/mL for IL-1 $\beta$ , 19 ng/mL for IL-6, 63 ng/mL for IL-8 and 31  
48 ng/mL for TNF- $\alpha$ ) concentrations. Five coal particle preparations were selected with homogeneous  
49 particle sizes ( $\sim$  0.11  $\mu$ m) but differing physico-chemical composition (Song et al., 2022). Mixtures  
50 of cytokines and particles were incubated for 24 h at 37°C in humidified 5% CO<sub>2</sub>, with a total  
51 volume of 500  $\mu$ L. After incubation, the mixture was analysed for cytokine concentration with or  
52 without centrifugation (12,000 g  $\times$  5 minutes). A cytotoxicity assay (lactate dehydrogenase assay,  
53 G1780 from Promega) was also performed in a cell-free model as described for cytokine analysis.

54 The cytokine binding experiment in the cell-free system (Figure 1) showed that particles  
55 significantly absorbed the cytokines in the media in a dose dependent manner. Amongst the

56 investigated cytokines, the reduction in IL-8 and TNF- $\alpha$  was particularly prominent. Therefore,  
57 these data support our hypothesis that coal particles are capable of binding to cytokines, which is  
58 likely to result in underestimation of their inflammatory potential. However, the binding affinity  
59 differed between coal samples and cytokines likely due to variability in the physico-chemical  
60 properties. For example, using a high dose of IL-8, the absorption varied from 14 to 69% between  
61 the 5 coal samples tested.

62 Several investigators have identified a similar binding effect of particles on cytokines. For example,  
63 Kocbach et al. reported up to 85% binding of cytokines (TNF- $\alpha$ , IL-1 $\beta$ , IL-6, IL-8) by carbonaceous  
64 particles, including particles from outdoor sources, ultrafine carbon black and diesel but not by  
65 mineral particles (quartz) (Kocbach et al., 2008). They further found that addition of serum proteins  
66 could partly or completely reduce the cytokine binding to particles (Kocbach et al., 2008). It is  
67 worth noting that our experiment included 10% FBS and yet cytokine absorption was still very high  
68 (e.g. 69% IL-8 binding to Coal 1), indicating that this strategy may not totally resolve the problem.  
69 Grytting et al. showed that a range of respirable stone particles (400  $\mu\text{g}/\text{mL}$  for 24 hours exposure)  
70 absorbed CXCL8 and IL-1 $\beta$ , which was of greater concern in DMEM medium, used with HBEC3-  
71 KT cells, but negligible in RPMI medium, used with THP-1 macrophages (Grytting et al., 2021).  
72 Thus, multiple factors could influence binding including particle composition, the specific cytokine  
73 (protein characteristic) and the culture conditions.

74 Subsequently, we tested the effect of different processing conditions / strategies on adsorption  
75 artefacts using these coal samples including the cell culture media, centrifugation, different  
76 detection methods (colorimetric and fluorescent), all of which have been reported to influence *in*  
77 *vitro* assay analysis (Herseth et al., 2013, Forest et al., 2015, Grytting et al., 2021). As shown in  
78 Figure 2 A-B, the absorption issue persisted in both RPMI medium and was not affected by the  
79 centrifuge protocol. It has been postulated that the interaction between particles and biological  
80 molecules interferes with absorbance measurements, confounding the results of the assay (Forest et  
81 al., 2015). However, our data showed that such interference was not improved by using a  
82 fluorescent detection method (Figure 2C). Of note, the cytotoxicity assay (LDH assay) was not  
83 affected by presence of particles (Figure 2D), which is measured using  
84 light transmission/absorbance. Thus, it is possible that the confounding of these immunoassays is  
85 likely due to blocking of antigenic regions in cytokines by the coal particles.

86 In conclusion, to date, no effective strategy is available to solve this problem. We agree with  
87 previous reports that cytokine binding experiments should be performed to implement appropriate  
88 correction factors in order to calculate the accurate production of secreted cytokines in the  
89 supernatant of cell culture experiments (Kocbach et al., 2008, Herseth et al., 2013). This is an  
90 underappreciated issue in many published studies on the comparative potency of particles from  
91 different sources.

92

### 93 **References**

94 Forest, V., Figarol, A., Boudard, D., Cottier, M., Grosseau, P. and Pourchez, J. (2015): Adsorption  
95 of lactate dehydrogenase enzyme on carbon nanotubes: how to get accurate results for the  
96 cytotoxicity of these nanomaterials. *Langmuir.*, **31**(12): 3635-3643.

97 Grytting, V. S., Refsnes, M., Ovrevik, J., Halle, M. S., Schonenberger, J., van der Lelij, R.,  
98 Snilsberg, B., Skuland, T., Blom, R. and Lag, M. (2021): Respirable stone particles differ in their  
99 ability to induce cytotoxicity and pro-inflammatory responses in cell models of the human airways.  
100 *Part Fibre Toxicol.*, **18**(1): 18.

101 Herseth, J. I., Totlandsdal, A. I., Bytingsvik, S., Kaur, J., Noer, M. and Bolling, A. K. (2013): The  
102 challenge of obtaining correct data for cellular release of inflammatory mediators after in vitro  
103 exposure to particulate matter. *Toxicol Lett.*, **221**: 110-117.

104 Kocbach, A., Totlandsdal, A. I., Lag, M., Refsnes, M. and Schwarze, P. E. (2008): Differential  
105 binding of cytokines to environmentally relevant particles: a possible source for misinterpretation of  
106 in vitro results? *Toxicol Lett.*, **176**: 131-137.

107 Song, Y., Southam, K., Beamish, B. B. and Zosky, G. R. (2022): Effects of chemical composition  
108 on the lung cell response to coal particles: Implications for coal workers' pneumoconiosis.  
109 *Respirology.*, **27**: 447-454.

110

111

112 **Figure legends**

113 **Figure 1 – Cytokine binding experiment in a cell-free system:** Inflammatory cytokines (IL-1 $\beta$ ,  
114 IL-6, IL-8 and TNF- $\alpha$ ) in either high (A) or low (B) concentration were co-incubated with five coal  
115 particles as well as the vehicle control (Blank) in THP-1 cell growth medium (RPMI-1640). The  
116 experiments were performed in triplicate. Difference was compared amongst the experimental  
117 groups using one-way ANOVA followed by post hoc least significant difference tests. Values are  
118 mean (SD). \*  $p < 0.05$ , \*\*  $p < 0.01$ , \*\*\*  $p < 0.001$  compared to the control group; ^  $p < 0.05$ , ^^  $p <$   
119  $0.01$ , ^^  $p < 0.001$ , all covered groups compared to the control group.

120

121 **Figure 2 – Effects of different conditions on quantification of *in vitro* cell response:** IL-8 (1000  
122 ng/mL) were co-incubated with five coal particles and the vehicle control (Blank) in THP-1 cell  
123 growth medium (RPMI-1640) and A549 cell medium (F12K), followed by either centrifuging or no  
124 centrifuging. IL-8 was quantified using Colorimetric ELISA assays (n = 3 per group; A-B). In the  
125 meantime, IL-8 quantification was performed in RPMI-1640 without centrifuging step using  
126 Fluorescent ELISA assays (n = 4 per group; C). Lactate dehydrogenase assay (LDH) was also  
127 performed in cell-free model (n = 3 per group; D). Difference was compared amongst the  
128 experimental groups using two-way ANOVA (except of fluorescent IL-8 study using one-way  
129 ANOVA) followed by post hoc least significant difference tests. \*  $p < 0.05$ , \*\*  $p < 0.01$  compared to  
130 the control group.

131

A

## High cytokine concentration

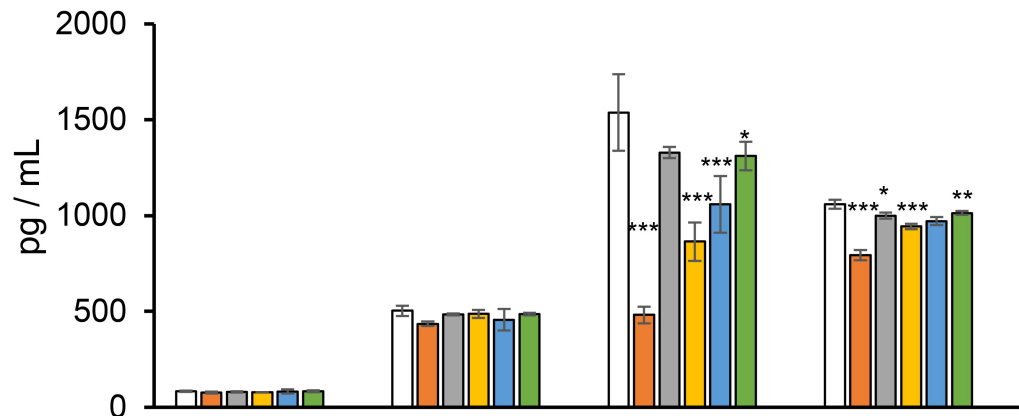

B

## Low cytokine concentration

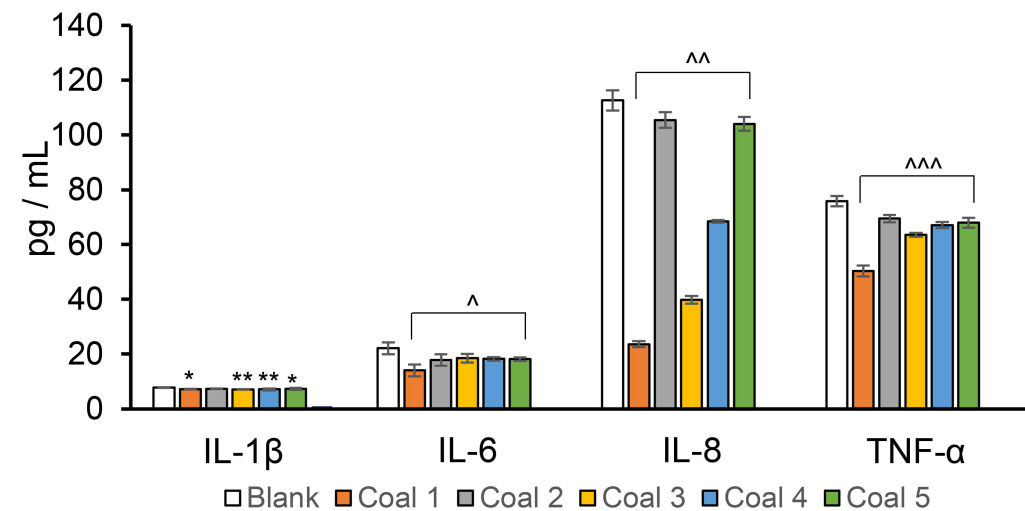

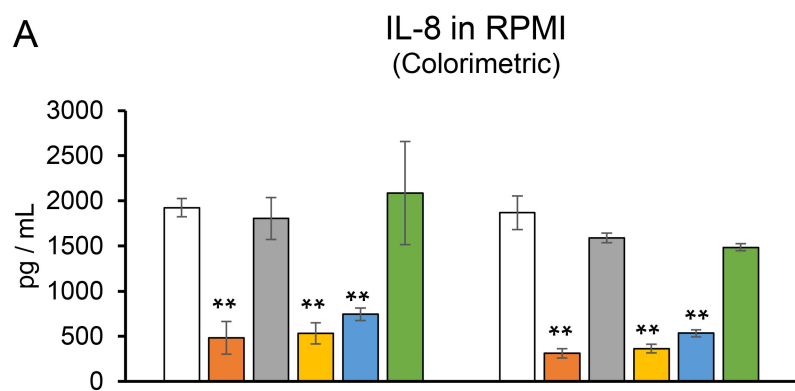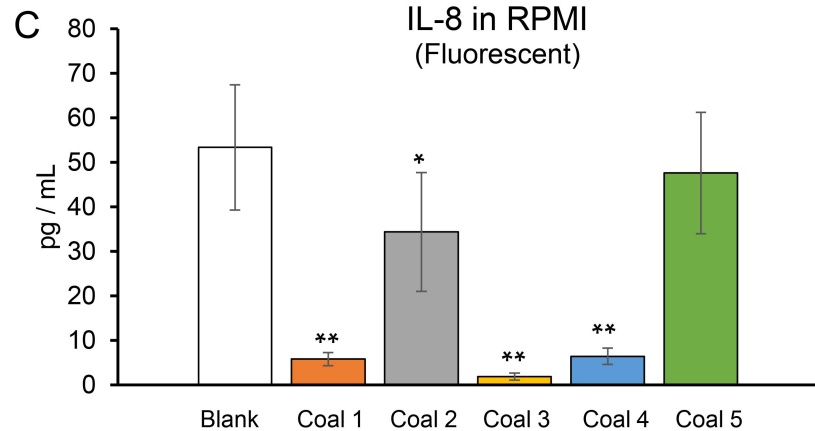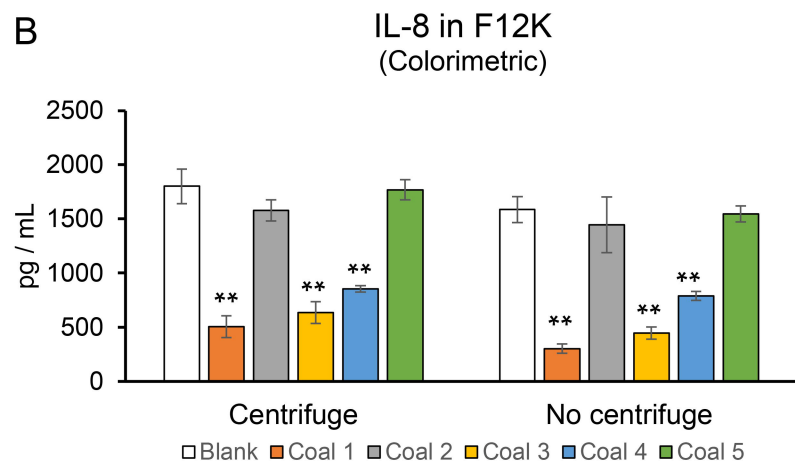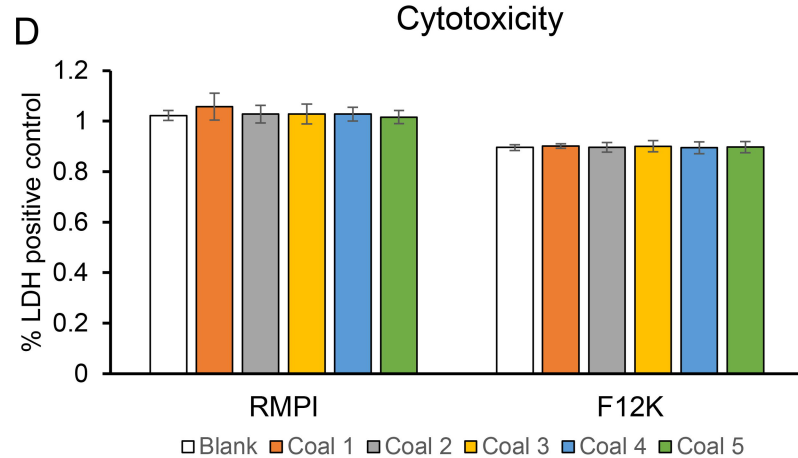

Source: https://www.biorxiv.org/content/10.1101/2023.01.16.524328v1.full.pdf
